# Supplementary material for: Recovery of lanthanum cations by functionalized magnetic multi-walled carbon nanotube bundles
Source: Royal Society of Chemistry journal article supplement (doi:10.1039/d0ra09902c), 2021-01-01
Supplement: d0ra09902c1.pdf [file d0ra09902c1.pdf]

**Electronic Supplementary Information (ESI)**

for

**Recovery of lanthanum cations by functionalized magnetic multi-walled  
carbon nanotube bundles**

Lijinhong Huang,<sup>1,2</sup> Lihong Liu,<sup>\*2</sup> Wanfu Huang,<sup>\*3</sup> Bingxin Zhao,<sup>3</sup> Zhangfeng Shen,<sup>4</sup> Yaqing  
Bao<sup>3</sup>, Hussein Znad<sup>2</sup>

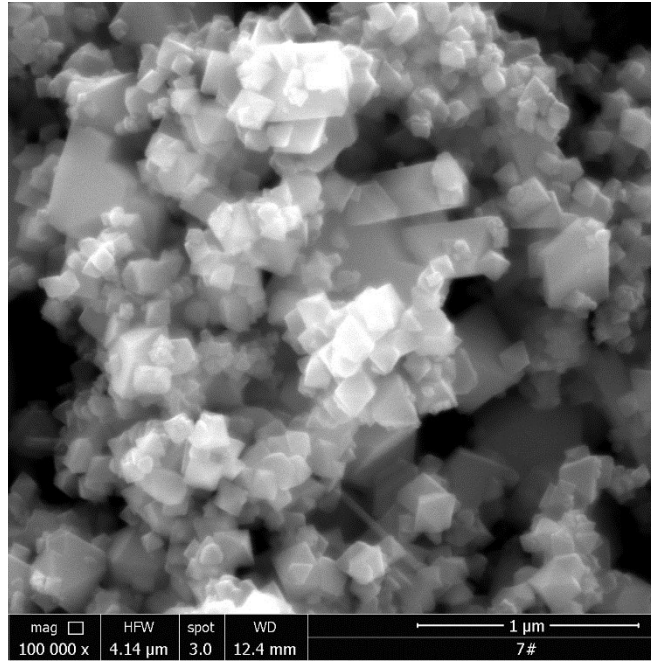

Fig. S1 High magnification SEM image of Fe<sub>3</sub>O<sub>4</sub> nanoparticles.

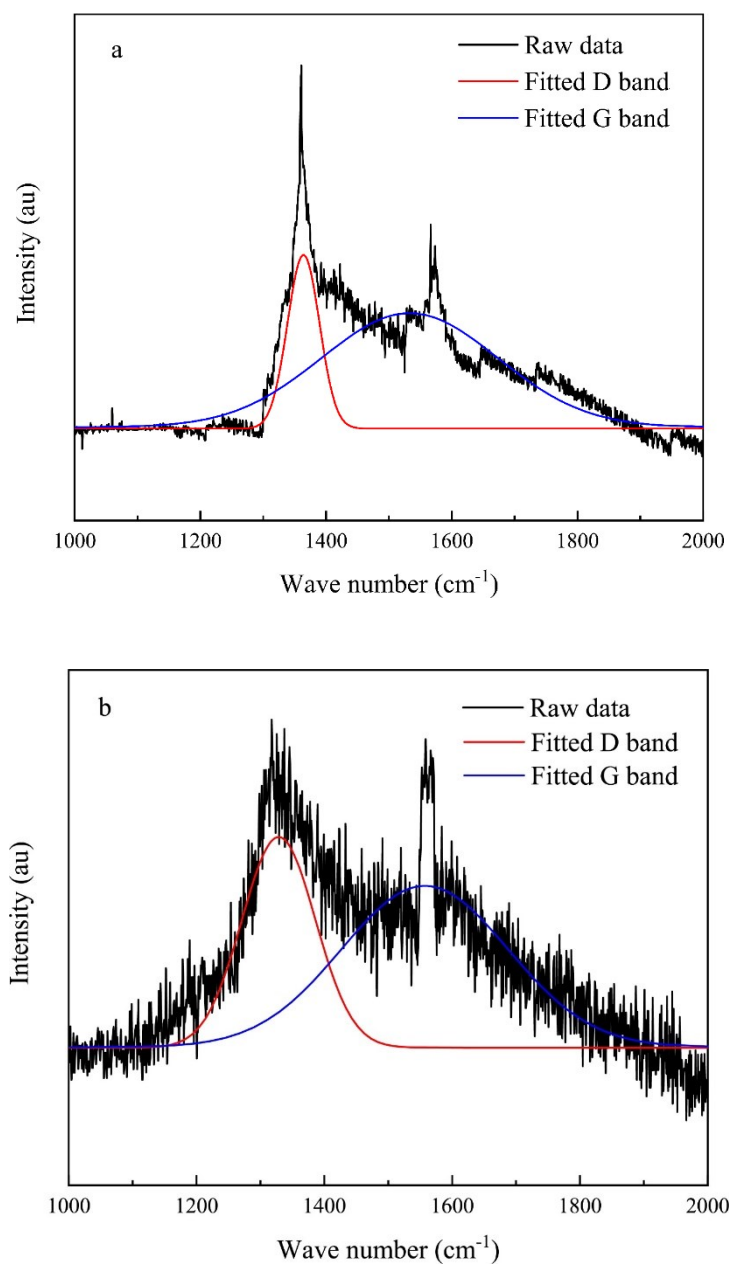

Fig. S2 Raman results of MWCNTs before (a) and after (b) functionalization.

Table S1 Recycle test results of CS<sub>2</sub> functionalized MWCNT@ Fe<sub>3</sub>O<sub>4</sub> as La<sup>3+</sup>adsorbent.

| Cycle Number | Removal rate<br>% | Adsorption capacity<br>(mg/g) |
|--------------|-------------------|-------------------------------|
| 1            | 87.50             | 23.23                         |
| 2            | 76.38             | 20.28                         |
| 3            | 72.79             | 19.32                         |

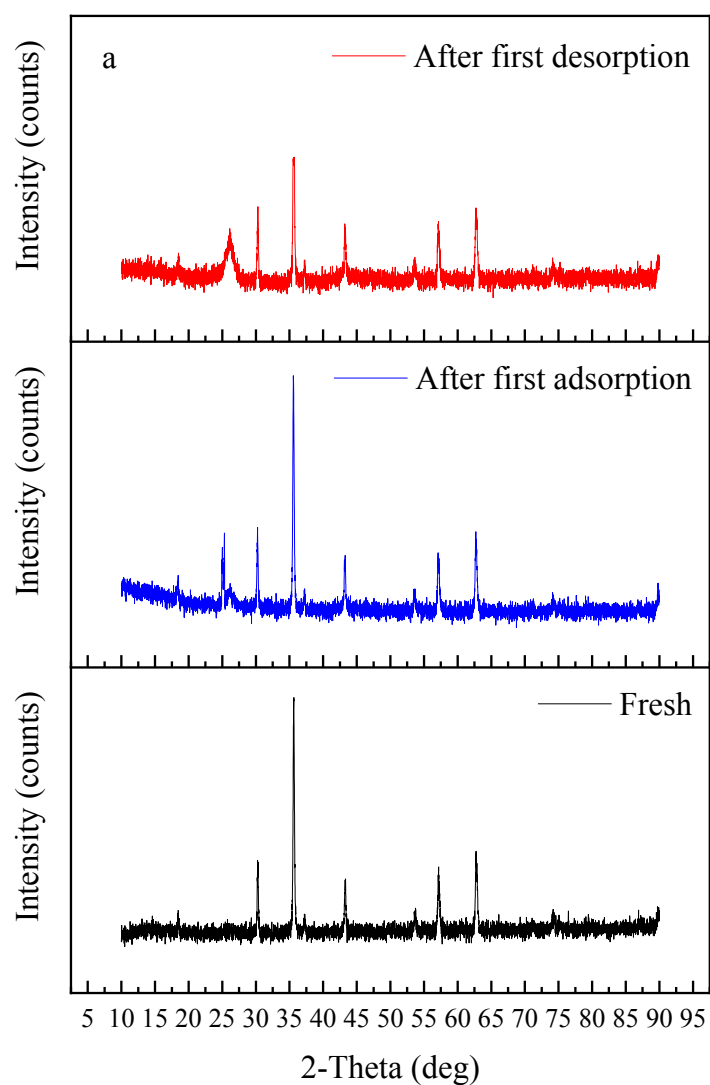

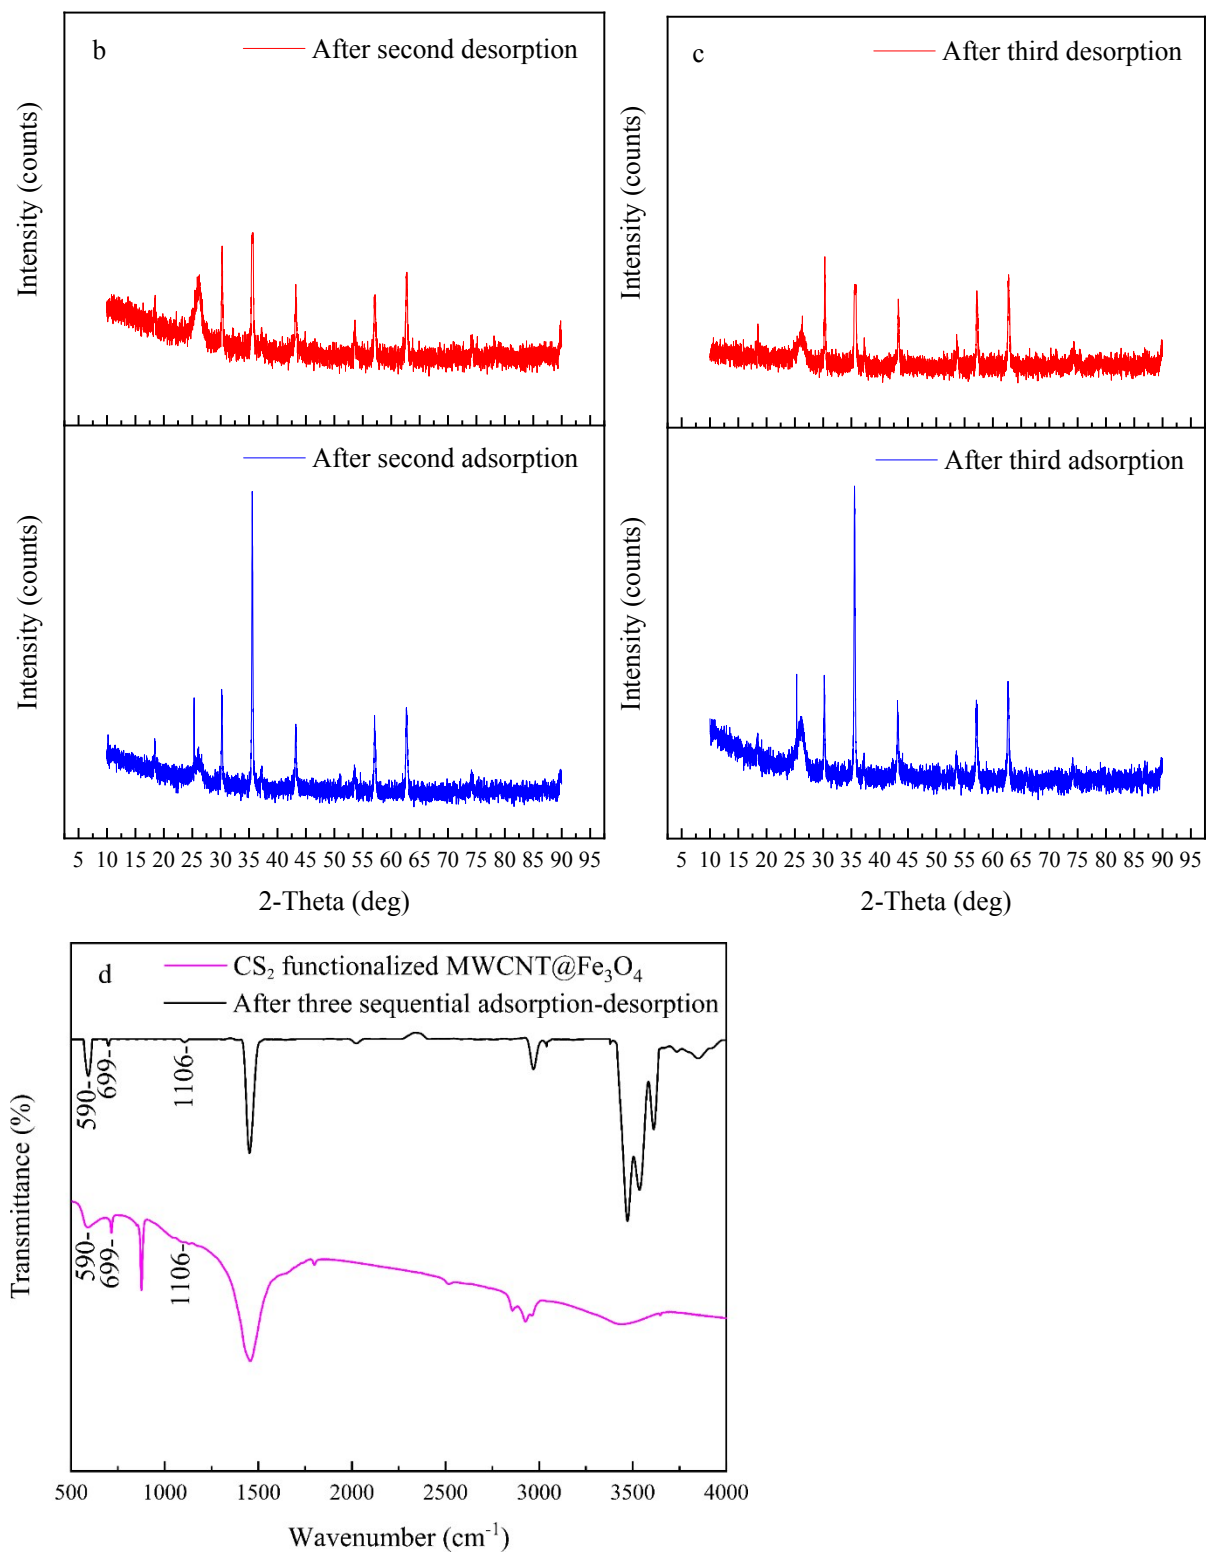

Fig. S3 XRD patterns of the adsorbent after sequential adsorption-desorption experiments in batch mode (a, b, and c). Fourier Transform Infrared (FT-IR) spectra of fresh and spent CS<sub>2</sub> functionalized MWCNT@Fe<sub>3</sub>O<sub>4</sub> (d).
